# Supplementary material for: Electronic Tongues for Inedible Media
Source: MDPI journal article supplement (doi:10.3390/s19235113), 2019-11-22
Supplement: s1 [file s1]

## Supplementary Materials

**Table S1.** Summary of the studies concerned with multisensor systems (MSS) application for water analysis.

| Target Analytes/<br>Integral Characteristics          | Sensor Type                                 | Concentration Range/<br>Groups of Samples                  | Reference |
|-------------------------------------------------------|---------------------------------------------|------------------------------------------------------------|-----------|
| Heavy metal cations and inorganic anions              | Ion-selective electrodes                    | From 1 to 10 <sup>-5</sup> mmol/L depending on the analyte | [2,3,14]  |
| Inorganic anions (cyanide)                            | Potentiometric sensors                      | 10–100 ppm                                                 | [4]       |
| Purification rate                                     | Voltammetric sensors                        | Water samples after different filters                      | [5,19]    |
| Mineral water brand                                   | Impedimetric sensors                        | Several water brands and tap water                         | [6]       |
|                                                       | Potentiometric sensors                      |                                                            | [17,18]   |
| Biochemical oxygen demand and PAH *-degrading ability | Amperometric biosensors                     | 1–50 mg/L                                                  | [7]       |
| Quality of water treatment                            | Enzymatically-modified amperometric sensors | Four water treatment levels                                | [8]       |
|                                                       | Potentiometric sensors                      | Samples from two wastewater treatments plants              | [25]      |
| Pesticides                                            | Enzymatically-modified amperometric sensors | 0–16 nmol/L                                                | [9,10]    |
| Soil nutrients                                        | Ion-selective electrodes                    | From 0.1 to 700 mg/L depending on the analyte              | [11,12]   |
| Nitrogen-containing inorganic compounds               | Ion-selective electrodes                    | 0.01–20 mmol/L                                             | [13]      |
| Hazardous substances                                  | Optical sensors                             | 10 <sup>-4</sup> –10 <sup>-7</sup> mol/L                   | [15]      |
| Toxicity assessment                                   | Potentiometric sensors                      | Various figures of merit in terms of bioassay              | [21–24]   |
| Contamination by biological toxins                    | Impedimetric sensors                        | 25–1000 ng/L                                               | [26]      |

|                        |                           |      |
|------------------------|---------------------------|------|
| Potentiometric sensors | 0–300 mg/L                | [27] |
| Potentiometric sensors | 0.2–7.2 $\mu\text{mol/L}$ | [28] |

\* PAH: polycyclic aromatic hydrocarbons.

**Table S2.** Summary of the studies concerned with MSS application for agricultural analysis.

| Target Analytes/<br>Integral Characteristics | Sensor Type                                | Concentration Range/<br>Groups of Samples      | Reference     |
|----------------------------------------------|--------------------------------------------|------------------------------------------------|---------------|
| Inorganic ions                               | Ion-selective electrodes                   | From 0.7 to 20 mmol/L depending on the analyte | [31]          |
|                                              | Microchip capillary electrophoresis device | 5–500 $\mu\text{mol/L}$                        | [36]          |
| Soil type and fertility assessment           | Ion-selective electrodes                   | Six types of soil                              | [32]          |
|                                              | Microfluidic interdigitated electrodes     | Several types of enriched soils                | [34,35,37,38] |
| Pesticides                                   | Enzyme biosensors                          | $10^{-7}$ – $10^{-10}$ mol/L                   | [39–43]       |
|                                              | Interdigitated electrodes                  | 1–10 ppb                                       | [44,45]       |
|                                              | Fluorescent sensors                        | 10–50 ppb                                      | [46,50]       |
|                                              | Nanoparticle-based colorimetric sensors    | 100–4000 ng/mL                                 | [47,51]       |
|                                              | Colorimetric sensors                       | $10^{-5}$ – $10^{-6}$ g/L                      | [15]          |
|                                              |                                            | $10^{-4}$ – $10^{-6}$ mol/L                    | [49]          |
|                                              | Impedimetric sensors                       | 0.1–5 nmol/L                                   | [48]          |

**Table S3.** Summary of the studies devoted to the application of MSS for medical analysis.

| Analyte                                                                                                                                                               | Samples                                            | Sensing units                                                                                                                                     | Principle of detection      | Limit of detection                     | Concentration range                                                                                                                                                                 | Computational analysis | Ref. |
|-----------------------------------------------------------------------------------------------------------------------------------------------------------------------|----------------------------------------------------|---------------------------------------------------------------------------------------------------------------------------------------------------|-----------------------------|----------------------------------------|-------------------------------------------------------------------------------------------------------------------------------------------------------------------------------------|------------------------|------|
| Ca <sup>2+</sup> , Mg <sup>2+</sup> , Na <sup>+</sup> ,<br>HCO <sub>3</sub> <sup>2-</sup> , Cl <sup>-</sup> , H <sup>+</sup> ,<br>HPO <sub>4</sub> <sup>2-</sup> ions | 45 solutions<br>modelling<br>human blood<br>plasma | 19 soli state and<br>polymeric chemical<br>sensors                                                                                                | potentiometry               | -                                      | 0.03-150 mmol/L,<br>typical for each<br>component in blood<br>plasma                                                                                                                | PLS, ANN               | [56] |
| ascorbic acid, uric acid<br>and acetaminophen<br>(paracetamol)                                                                                                        | 50 standard<br>solutions<br>prepared by<br>SIA     | platinum, gold and<br>epoxy-graphite discs                                                                                                        | linear sweep<br>voltammetry | -                                      | 0.1 – 1.1 mM                                                                                                                                                                        | ANN                    | [57] |
| urea, ammonium,<br>potassium and sodium                                                                                                                               | diluted and<br>spiked urine<br>samples             | urease immobilized<br>onto PVC-COOH<br>layer of ammonium<br>and hydrogen ISEs;<br>ammonium,<br>potassium, sodium,<br>hydrogen and generic<br>ISEs | potentiometry               | -                                      | 10 <sup>-4</sup> – 10 <sup>-2</sup> M<br>(urea); 5x10 <sup>-6</sup> –<br>5x10 <sup>-4</sup> M<br>(ammonium); 5x10 <sup>-5</sup> – 5x10 <sup>-3</sup> M<br>(potassium and<br>sodium) | ANN; PLS               | [58] |
| urea, creatinine,<br>ammonium, potassium<br>and sodium                                                                                                                | raw and<br>spiked urine<br>samples                 | urease and creatinine<br>deiminase<br>immobilized onto<br>ammonium ISEs;<br>ammonium,                                                             | potentiometry               | 1.0x10 <sup>-4</sup> M<br>(creatinine) | 0.1 - 10 mM (urea<br>and creatinine);<br>0.005 - 0.5 mM<br>(ammonium); 0.005<br>- 0.5 mM                                                                                            | ANN                    | [59] |

|                                                                                                                 |                                                              | potassium, sodium<br>and generic ISEs                                                                                                                                                                                                                                                                                                                                                                                                                                                                   |                       |   | (potassium and<br>sodium)                                                |                   |      |
|-----------------------------------------------------------------------------------------------------------------|--------------------------------------------------------------|---------------------------------------------------------------------------------------------------------------------------------------------------------------------------------------------------------------------------------------------------------------------------------------------------------------------------------------------------------------------------------------------------------------------------------------------------------------------------------------------------------|-----------------------|---|--------------------------------------------------------------------------|-------------------|------|
| creatinine                                                                                                      | 59 urine<br>samples<br>without<br>dilution                   | 7 working electrodes:<br>glassy carbon, Au, Pt,<br>Ag, Ni, Pd, Cu.                                                                                                                                                                                                                                                                                                                                                                                                                                      | cyclic<br>voltammetry | - | 2 – 30 mmolL <sup>-1</sup>                                               | PCA; SVMs;<br>PLS | [66] |
| sodium, potassium,<br>ammonium, calcium,<br>magnesium, chloride,<br>sulfate, phosphate,<br>urate and creatinine | 136 urine<br>samples                                         | 19 chemical sensors:<br>Na <sup>+</sup> , K <sup>+</sup> , NH <sub>4</sub> <sup>+</sup> , Ca <sup>2+</sup> ,<br>Mg <sup>2+</sup> , Ca <sup>2+</sup> + Mg <sup>2+</sup> ,<br>NO <sub>3</sub> <sup>-</sup> , Cl <sup>-</sup> , CO <sub>3</sub> <sup>2-</sup> ,<br>SO <sub>4</sub> <sup>2-</sup> ; 5 PVC-<br>plasticized anion-<br>sensitive based on<br>various anion-<br>exchangers; 3 PVC-<br>plasticized cation-<br>sensitive based on<br>different tetraphenyl<br>borate derivatives; pH<br>electrode | potentiometry         | - | mM                                                                       | PCA; LR; PLS      | [61] |
| Ca <sup>2+</sup> (kidney stones)                                                                                | urine samples                                                | 12 ISFETs; 5 EGFETs<br>based on thin film of<br>SnO <sub>2</sub> /ITO/Glass and<br>the immobilized Ca <sup>2+</sup><br>ionophore on PVC                                                                                                                                                                                                                                                                                                                                                                 | potentiometry         | - | 0.1 mmolL <sup>-1</sup> – 1<br>molL <sup>-1</sup>                        | LR; HSPICE        | [63] |
| Na <sup>+</sup> , K <sup>+</sup> , Ca <sup>2+</sup>                                                             | synthetic and<br>real human<br>sweat samples                 | ISEs based on PVC<br>layers; ISEs with solid<br>reference electrode<br>based on PVA                                                                                                                                                                                                                                                                                                                                                                                                                     | potentiometry         | - | mM                                                                       | -                 | [62] |
| urea and creatinine                                                                                             | dialysate<br>fluids with<br>creatinine and<br>urea additives | ISEs based on PVC<br>and different amounts<br>of lipophilic additives;<br>ISEs based on PVC-<br>COOH modified by                                                                                                                                                                                                                                                                                                                                                                                        | potentiometry         | - | 3 – 12 mmolL <sup>-1</sup><br>(urea); 0.10 – 0.32<br>mmolL <sup>-1</sup> | PLS               | [58] |

|                                                                                                                                                                                                                                                                                                            |                                                                                              |                                                                                                               |                                   |        |                                       |                      |      |
|------------------------------------------------------------------------------------------------------------------------------------------------------------------------------------------------------------------------------------------------------------------------------------------------------------|----------------------------------------------------------------------------------------------|---------------------------------------------------------------------------------------------------------------|-----------------------------------|--------|---------------------------------------|----------------------|------|
| urease and creatinine deiminase; pH electrode                                                                                                                                                                                                                                                              |                                                                                              |                                                                                                               |                                   |        |                                       |                      |      |
| Concanavalin A (Con-A), Cytochrome C (Cyt-C), Egg white albumin (EA), Hemoglobin (Hem), Horseradish peroxidase (HRP), Human serum albumin (HSA), Immunglobulin G (IgG), Lysozyme (Lys), Myoglobin (Myo), Pepsin (Pep), Transferrin (TRF), Trypsin (Try), mixture of proteins: Lys/Try, Lys/Pep and Lys/HAS | target proteins in aqueous solutions; diluted urine samples spiked with target proteins      | AuNPs decorated by two single-stranded oligonucleotides (TBA and T15) with different molar ratios             | colorimetry                       | 200 nM | 50 – 1000 nM                          | LDA                  | [65] |
| creatinine (bladder tumor)                                                                                                                                                                                                                                                                                 | 51 urine samples                                                                             | miniaturized metallic sensors (metal of high purity and alloys) and ISEs with PVC solvent polymeric membranes | potentiometry                     | -      | 10 <sup>-5</sup> - 10 <sup>-1</sup> M | PCA; PLS-DA; FFBP NN | [59] |
| prostate cancer                                                                                                                                                                                                                                                                                            | 114 urine samples (71 pre-surgery, 26 post-surgery and 17 with benign prostatic hyperplasia) | 7 working electrodes: Ir, Rh, Pt, Au, Ag, Co, Cu                                                              | large amplitude pulse voltammetry | -      | -                                     | PLS-DA               | [64] |

|                 |                                                                       |                                                                                                |                       |   |   |                            |      |
|-----------------|-----------------------------------------------------------------------|------------------------------------------------------------------------------------------------|-----------------------|---|---|----------------------------|------|
| prostate cancer | 89 diluted urine samples (43 cancer patients and 46 in control group) | 28 sensor membranes based on PVC-plasticized, chalcogenide glass and polycrystalline materials | potentiometry         | - | - | PCA; SIMCA; PLS-DA; LR; RF | [67] |
| glaucoma        | 20 blood-serum samples (14 sick and 6 healthy humans)                 | screen printed carbon electrodes                                                               | inversion voltammetry | - | - | LDA                        | [60] |

Abbreviations/acronyms: artificial neural networks (ANN); carboxylated poly(vinyl chloride) (PVC-COOH); cyclic voltammetry (CV); extended gate field-effect transistor (EGFET); feed forward back-propagation neural network (FFBP NN); gold nanoparticle (AuNP); Hailey - simulation program with integrated circuit emphasis (HSPICE); ion-selective electrode (ISE); ion-sensitive field-effect transistor (ISFET); linear discriminant analysis (LDA); logistic regression (LR); partial least squares (PLS); partial least squares discriminant analysis (PLS-DA); polyvinyl acetate (PVA); poly(vinyl chloride) (PVC); principal component analysis (PCA); random forest (RF); sequential injection analysis (SIA); soft independent modelling of class analogy (SIMCA); support vector machines (SVMs).
